# Supplementary material
Source: PubMed Central journal article supplement (PMC3246233)
Supplement: ismej201176x7.pdf [file ismej201176x7.pdf]

**Table S1.** Locations and environmental parameters for the MYI and seawater samples. Concentration factor indicates the average fold increase in concentration for constituents partitioned into the brine phase of MYI. Values indicated by a dash are not available, value indicated by nd were not detected.

| Sample | Type  | Date      | Latitude    | Longitude    | Salinity | T (°C) | Abundance<br>(cells ml <sup>-1</sup> x 10 <sup>4</sup> ) | Chlorophyll <i>a</i><br>(mg m <sup>-3</sup> ) | pEPS† | Concentration<br>factor |
|--------|-------|-----------|-------------|--------------|----------|--------|----------------------------------------------------------|-----------------------------------------------|-------|-------------------------|
| I13    | Ice   | 8/21/2010 | 89°27.12' N | 129°19.70' W | 1.9*     | -1.1   | 1.68                                                     | 0.025                                         | 2.56  | 12                      |
| I14    | Ice   | 8/26/2010 | 88°42.00' N | 69°45.00' W  | 0.7*     | -1.2   | 8.40                                                     | 0.055                                         | 2.29  | 35                      |
| S15    | Water | 8/15/2010 | 88°42.66' N | 158°53.42' E | 32.57    | -1.5   | -                                                        | -                                             | -     | -                       |
| S16    | Water | 8/21/2010 | 88°27.13' N | 129°20.37' W | 31.78    | -1.5   | -                                                        | -                                             | -     | -                       |
| S17    | Water | 8/26/1010 | 88°43.74' N | 58°27.28' W  | 30.92    | -1.5   | 18.40                                                    | 0.037                                         | nd    | -                       |

†particulate exopolymers in µg glucose equivalents ml<sup>-1</sup>

\*average value for melted core determined by refractometer, all other salinities determined conductometrically
