# Supplementary material
Source: PubMed Central journal article supplement (PMC3246233)
Supplement: ismej201176x8.pdf [file ismej201176x8.pdf]

**Table S2.** Pairwise comparison of sample similarity for 97, 93, and 90 % similarity definitions of OTU using richness and abundance-based Sørensen indices.

| Sample pair |     | 97 % |                         |                          | 93 % |                         |                          | 90 % |                         |                          |
|-------------|-----|------|-------------------------|--------------------------|------|-------------------------|--------------------------|------|-------------------------|--------------------------|
|             |     | OTU  | Richness based Sørensen | Abundance based Sørensen | OTU  | Richness based Sørensen | Abundance based Sørensen | OTU  | Richness based Sørensen | Abundance based Sørensen |
| I13         | I14 | 97   | 0.469                   | 0.944                    | 93   | 0.499                   | 0.943                    | 90   | 0.553                   | 0.947                    |
| I13         | S15 | 97   | 0.044                   | 0.565                    | 93   | 0.082                   | 0.604                    | 90   | 0.125                   | 0.622                    |
| I13         | S16 | 97   | 0.072                   | 0.322                    | 93   | 0.116                   | 0.377                    | 90   | 0.152                   | 0.419                    |
| I13         | S17 | 97   | 0.074                   | 0.594                    | 93   | 0.075                   | 0.586                    | 90   | 0.128                   | 0.624                    |
| I14         | S15 | 97   | 0.051                   | 0.416                    | 93   | 0.086                   | 0.451                    | 90   | 0.123                   | 0.474                    |
| I14         | S16 | 97   | 0.092                   | 0.306                    | 93   | 0.127                   | 0.377                    | 90   | 0.177                   | 0.394                    |
| I14         | S17 | 97   | 0.065                   | 0.389                    | 93   | 0.093                   | 0.403                    | 90   | 0.139                   | 0.439                    |
| S15         | S16 | 97   | 0.428                   | 0.978                    | 93   | 0.531                   | 0.984                    | 90   | 0.727                   | 0.990                    |
| S15         | S17 | 97   | 0.445                   | 0.971                    | 93   | 0.577                   | 0.981                    | 90   | 0.647                   | 0.987                    |
| S16         | S17 | 97   | 0.539                   | 0.983                    | 93   | 0.631                   | 0.990                    | 90   | 0.662                   | 0.994                    |
