# Supplementary material
Source: PubMed Central journal article supplement (PMC3246233)
Supplement: ismej201176x11.pdf [file ismej201176x11.pdf]

**Table S5.** Quantities from DNA collection, isolation, and processing for each MYI and seawater sample.

| <b>Sample</b> | <b>Volume sampled (L)</b> | <b>DNA quantity (ng <math>\mu\text{L}^{-1}</math>)</b> | <b>Reads</b> | <b>High quality reads</b> |
|---------------|---------------------------|--------------------------------------------------------|--------------|---------------------------|
| I13           | 40†                       | 4.89                                                   | 8 324        | 8 300                     |
| I14           | 61†                       | 12.5                                                   | 4 073        | 4 052                     |
| S15           | 49                        | 5.18                                                   | 11 777       | 11 649                    |
| S16           | 84                        | 16.7                                                   | 11 387       | 11 321                    |
| S17           | 28                        | 6.33                                                   | 11 600       | 11 547                    |

† Volume includes ice melt and 17 L of added brine solution
