# Supplementary material
Source: PubMed Central journal article supplement (PMC3246233)

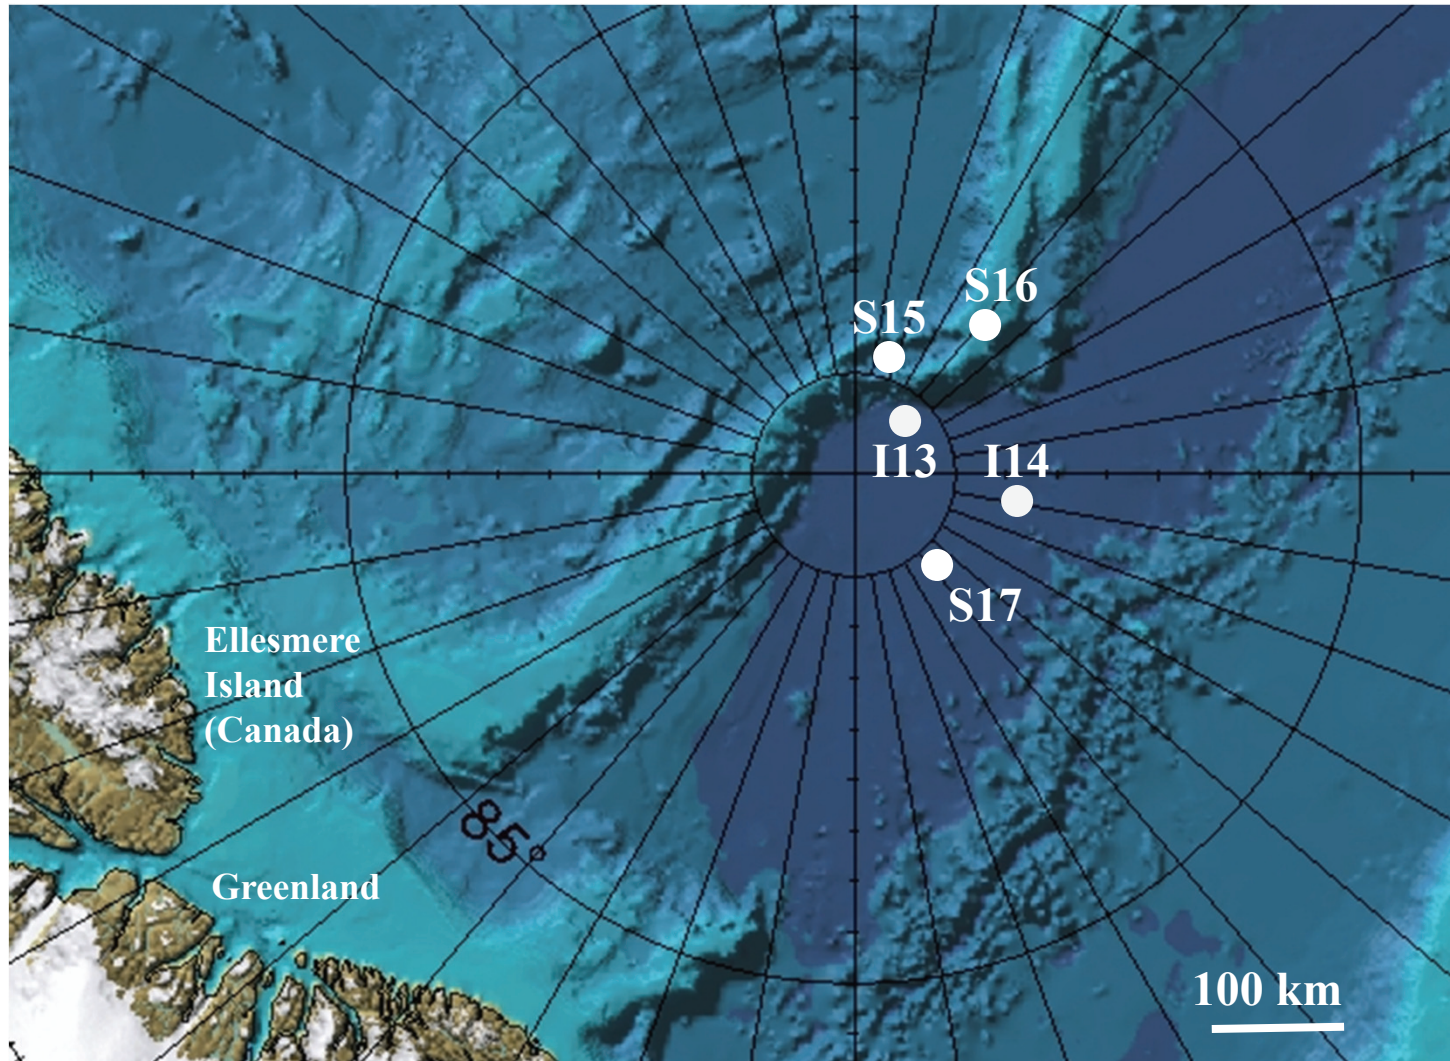

Fig. S1

Supplement: ismej201176x1.pdf [file ismej201176x1.pdf]

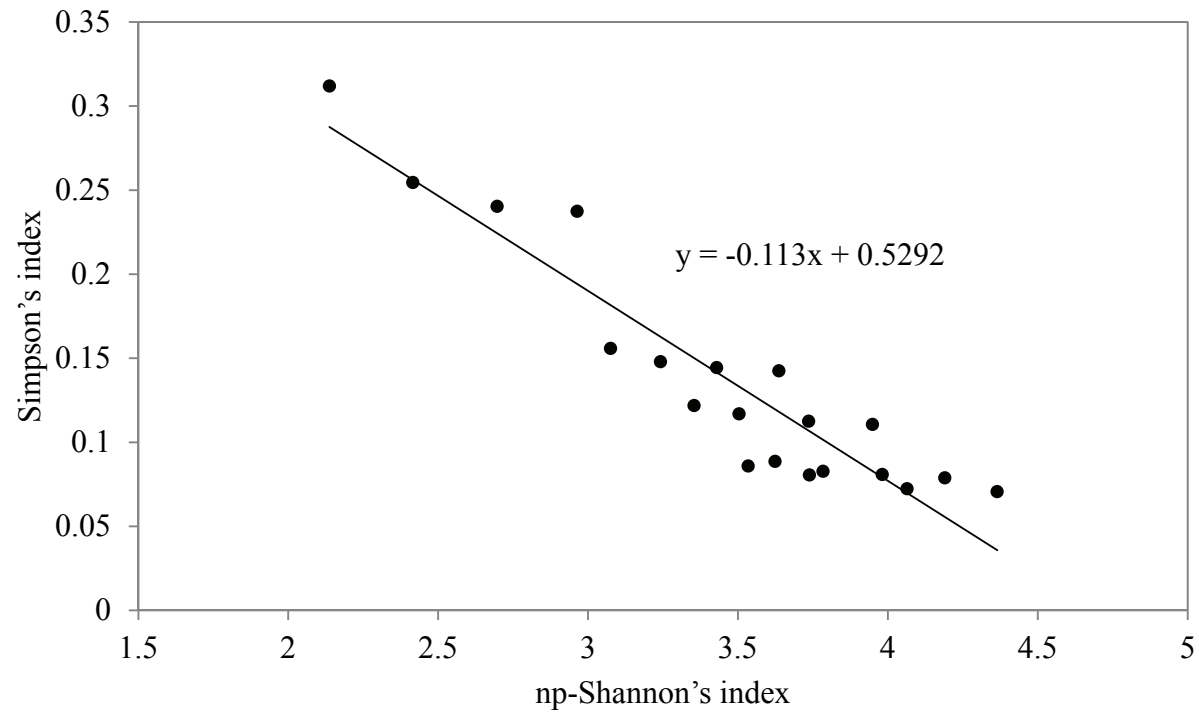

Fig. S2

Supplement: ismej201176x2.pdf [file ismej201176x2.pdf]

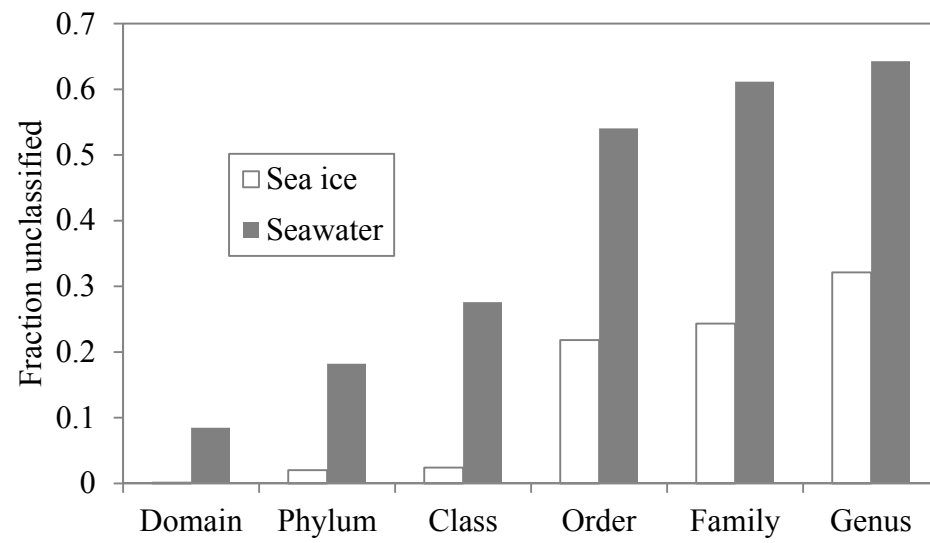

Fig. S3

Supplement: ismej201176x3.pdf [file ismej201176x3.pdf]

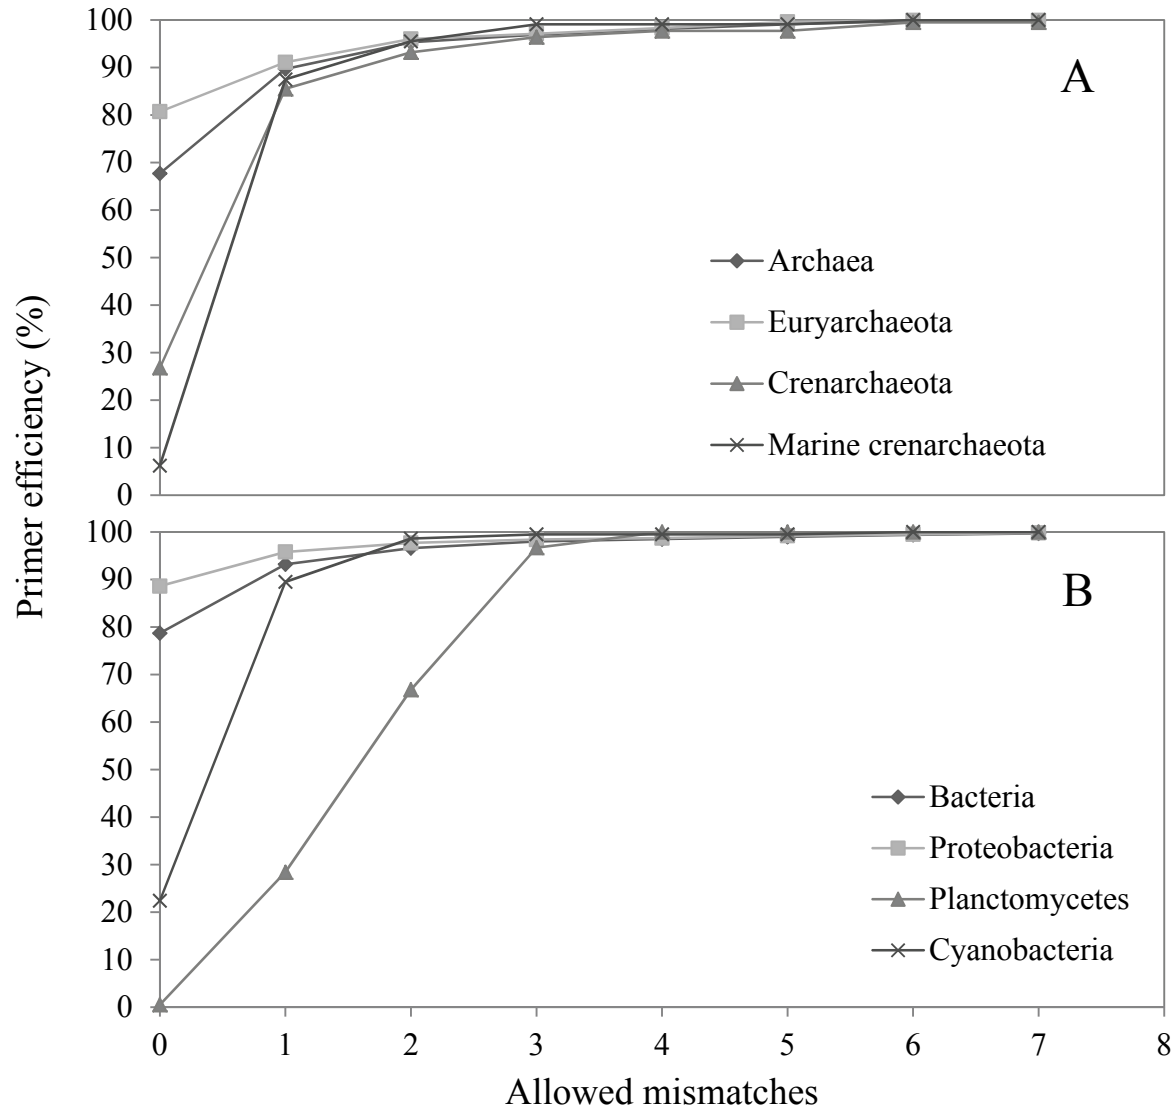

Fig. S4

Supplement: ismej201176x4.pdf [file ismej201176x4.pdf]

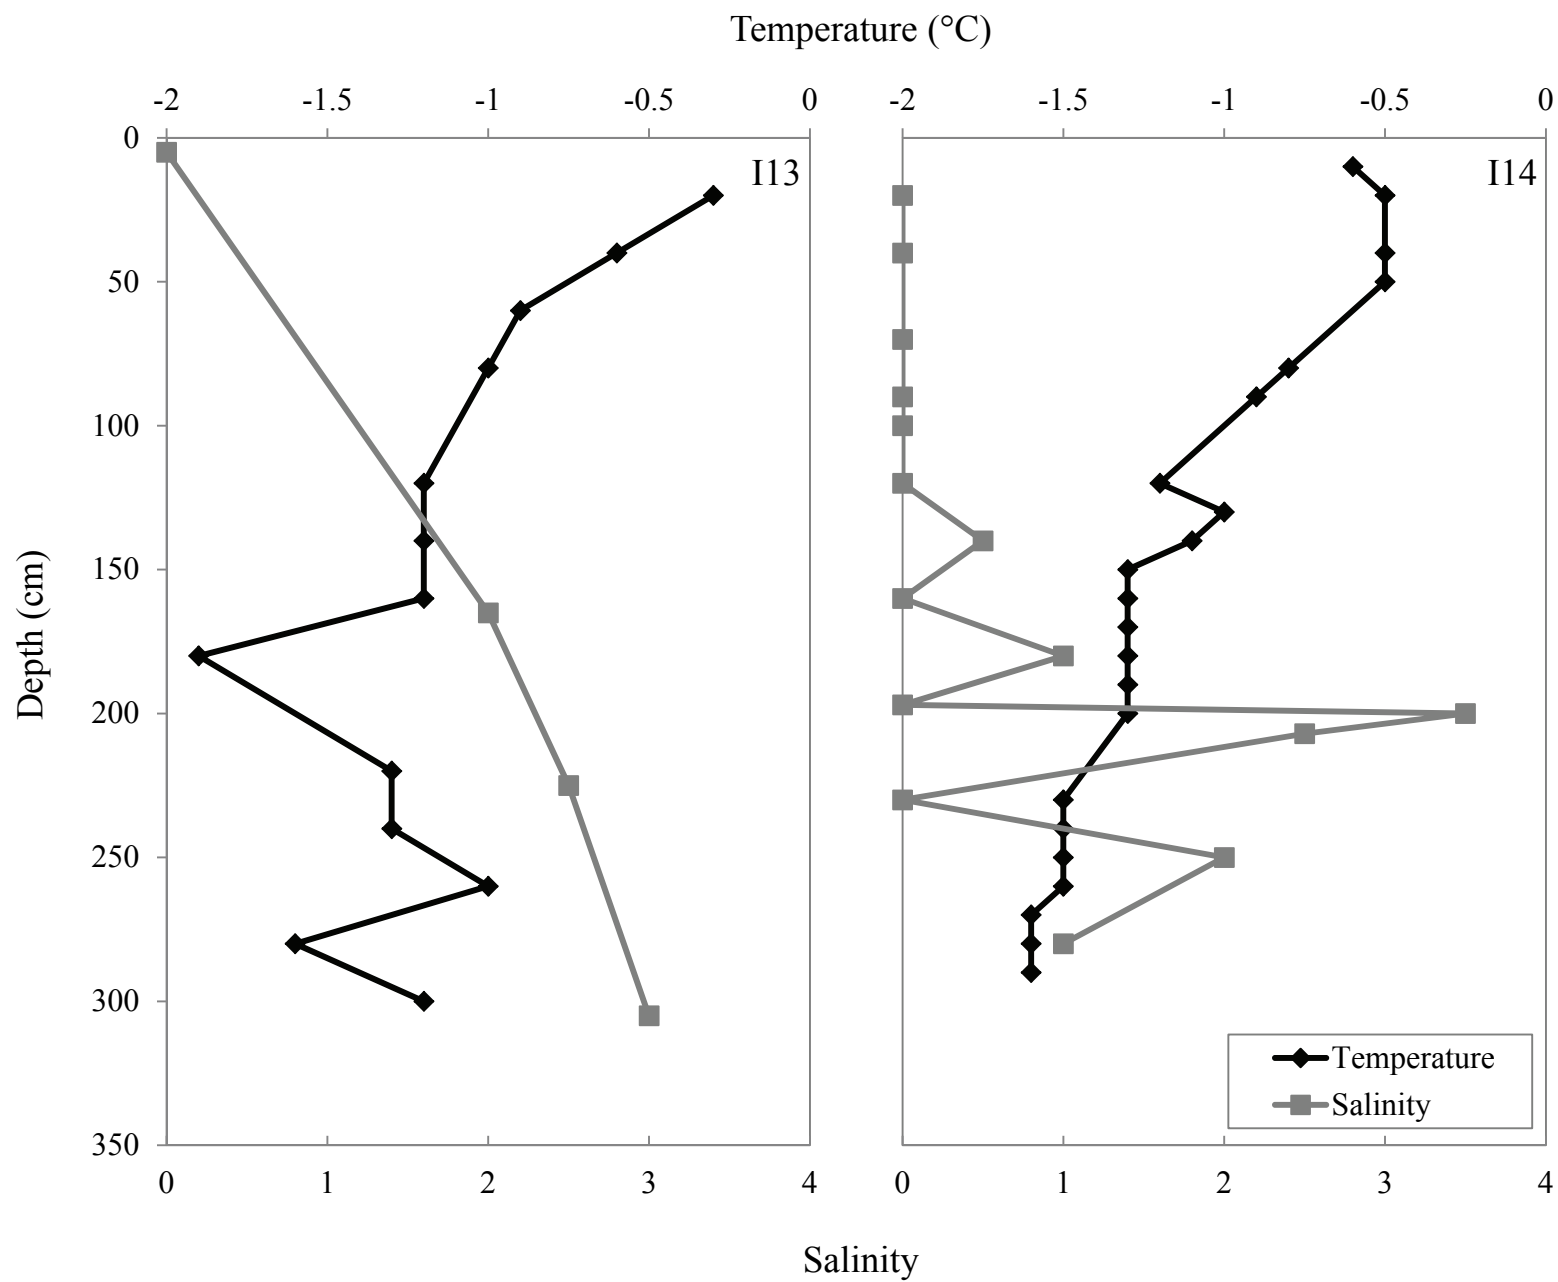

Fig. S5

Supplement: ismej201176x5.pdf [file ismej201176x5.pdf]

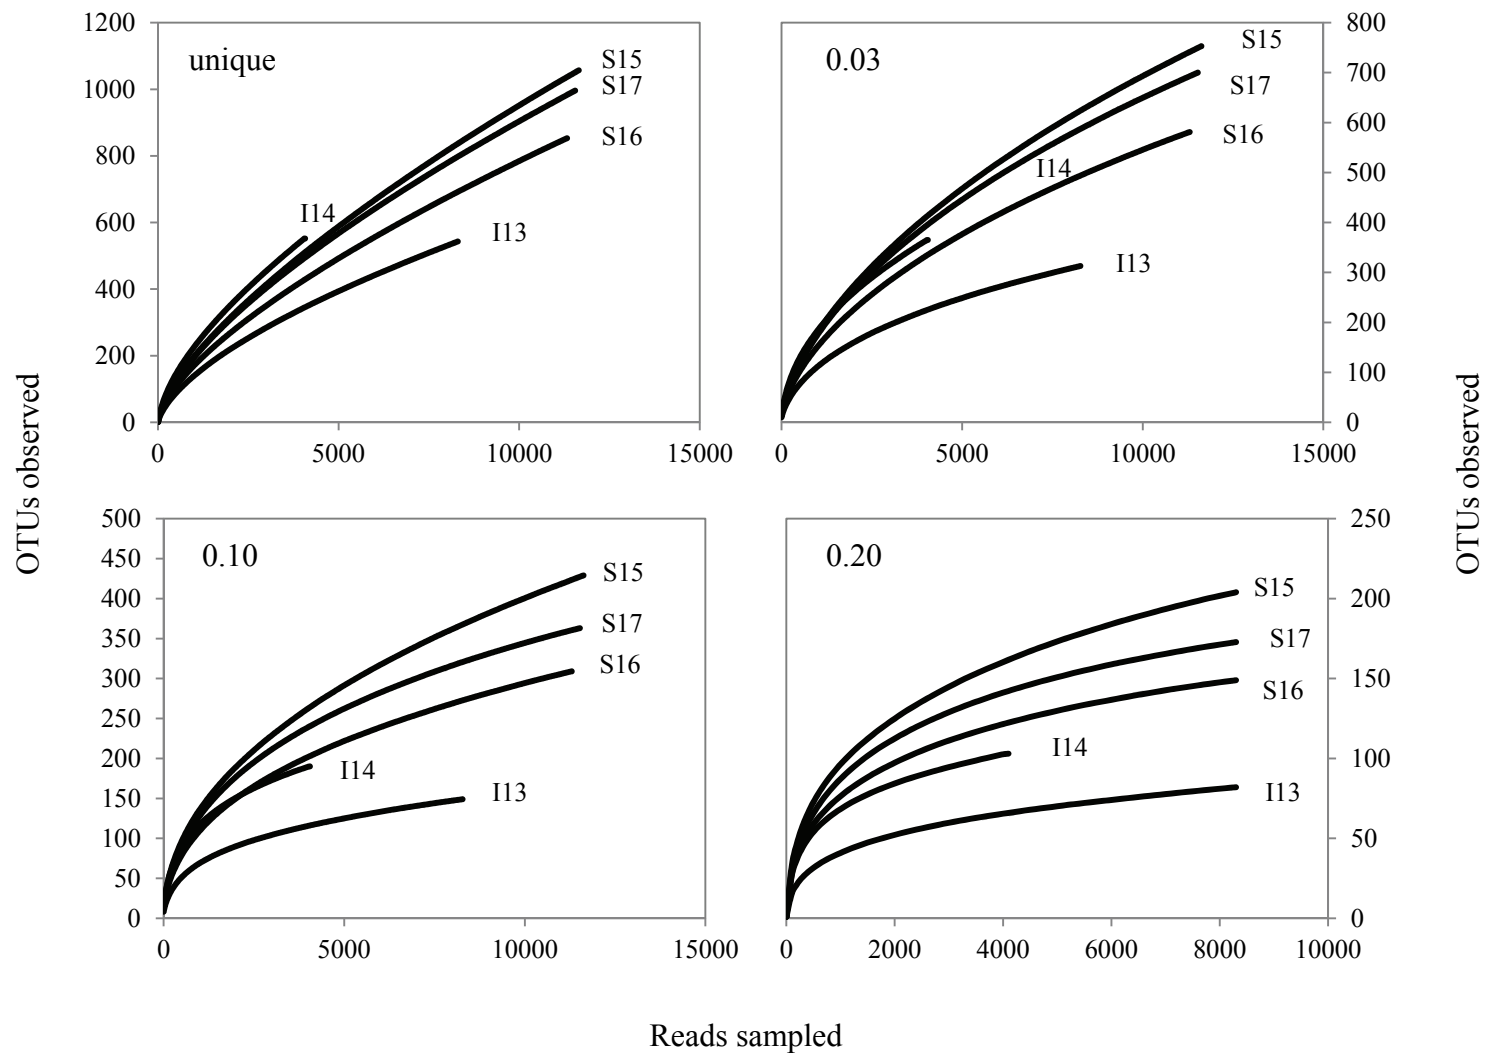

Fig. S6

Supplement: ismej201176x6.pdf [file ismej201176x6.pdf]
